# Supplementary material for: Atmospheric fate of two relevant unsaturated ketoethers: kinetics, products and mechanisms for the reaction of hydroxyl radicals with ( E )-4-methoxy-3-buten-2-one and 1-( E )-1-methoxy-2-methyl-1-penten-3-one
Source: Copernicus journal article supplement (doi:10.5194/acp-2019-867), 2020-02-13
Supplement: Supplementary file 1 [file acp-2019-867-supplement.pdf]

# Supplementary Information

for

**Atmospheric fate of two relevant unsaturated ketoethers: kinetics, products and mechanisms for the reaction of hydroxyl radicals with (*E*)-4-methoxy-3-buten-2-one and 1-(*E*)-1-methoxy-2-methyl-1-penten-3-one.**

Rodrigo G. Gibilisco\*<sup>a</sup>, Ian Barnes<sup>a</sup>, Iustinian Bejan\*<sup>b</sup>, Peter Wiesen<sup>a</sup>

*<sup>a</sup>Bergische Universität Wuppertal, Institute for Atmospheric and Environmental Research, 42097 Wuppertal / Germany.*

*<sup>b</sup>Faculty of Chemistry and Integrated Center of Environmental Science Studies in the North East Region - CERNESIM, "Al. I. Cuza" University, Iasi, Romania*

## Content Summary

**Fig. S1:** Residual spectrum obtained on the TMBO + OH radical reaction (Fig. 3 trace H) focused in the frequency region between 3400 cm<sup>-1</sup> and 3800cm<sup>-1</sup>.

**Fig. S2:** Concentrations of carbonyls formed against reacted TMBO in the reaction with OH radicals.

**Fig. S3:** Residual spectrum obtained in the MMPO + OH reaction (Fig. 4 trace H) in the frequency region between 3400 cm<sup>-1</sup> and 3800cm<sup>-1</sup>.

**Fig. S4:** Concentrations of carbonyls formed against reacted MMPO in the reaction with OH radicals.

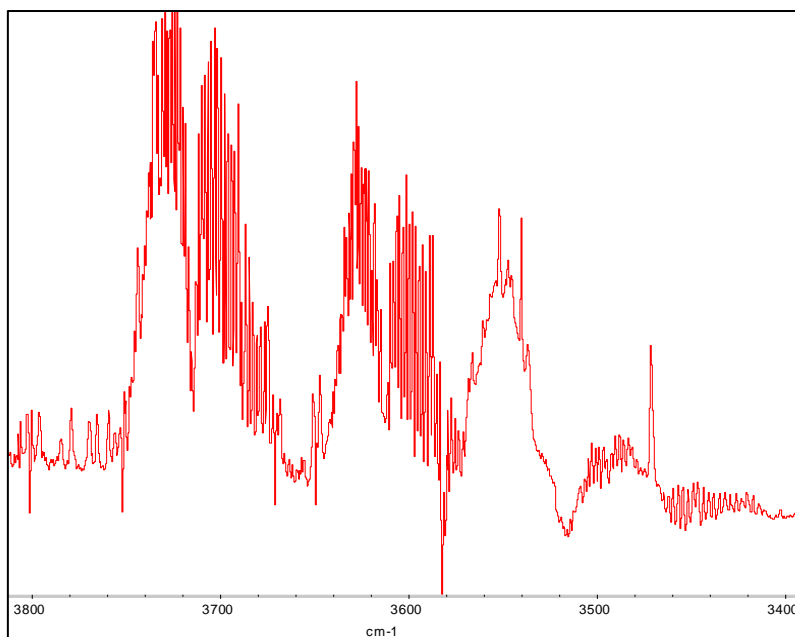

**Figure S1.** Residual spectrum obtained in the TMBO + OH reaction (Fig. 3 trace H) in the frequency region between 3400  $\text{cm}^{-1}$  and 3800 $\text{cm}^{-1}$ .

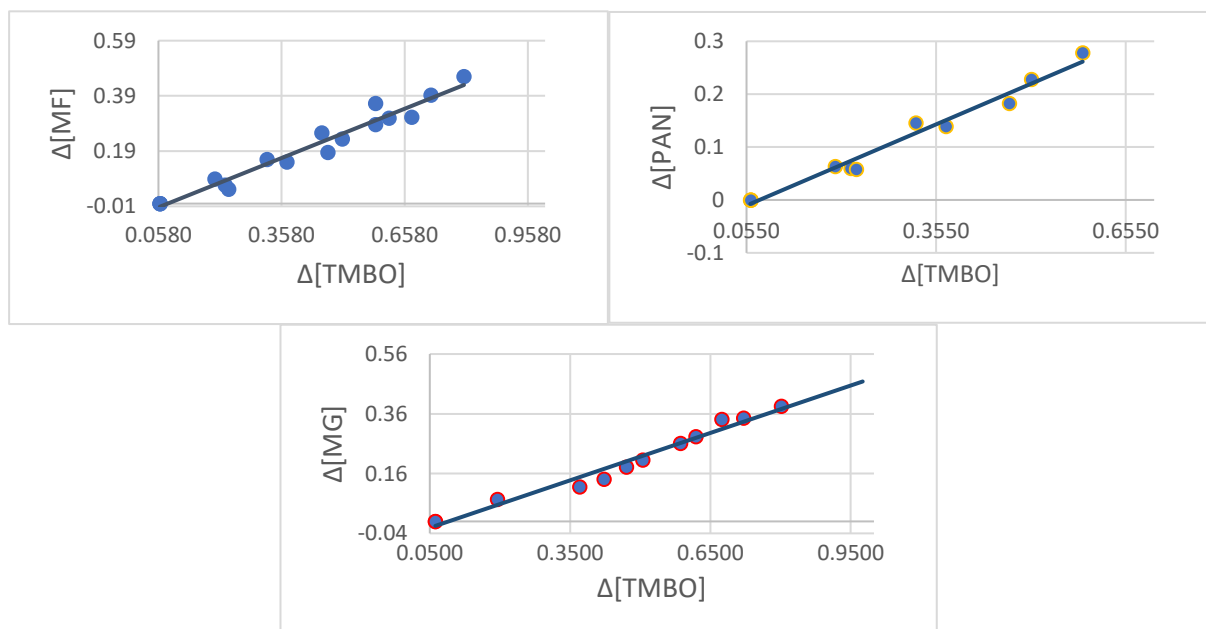

**Figure S2.** Example of the concentrations of carbonyls formed against reacted TMBO in the reaction with OH radicals.

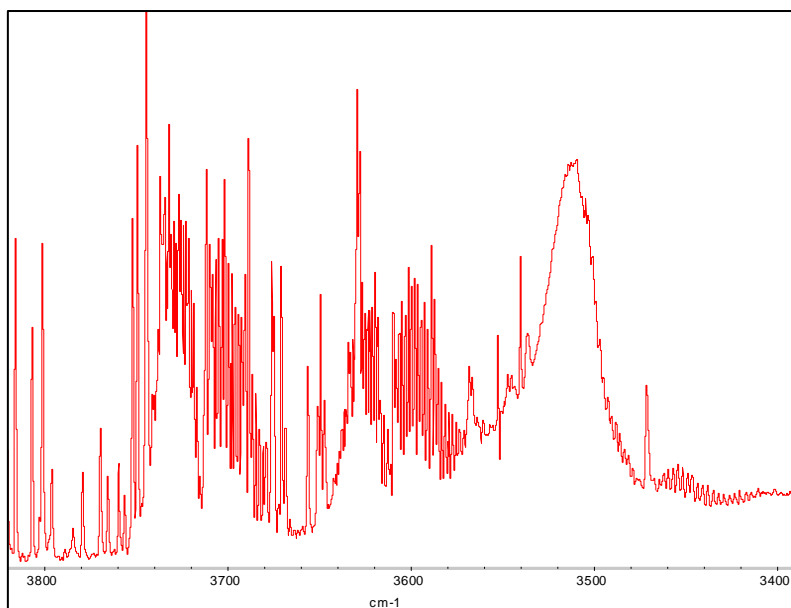

**Figure S3.** Residual spectrum obtained in the MMPO + OH reaction (Fig. 4 trace H) in the frequency region between  $3400\text{ cm}^{-1}$  and  $3800\text{ cm}^{-1}$ .

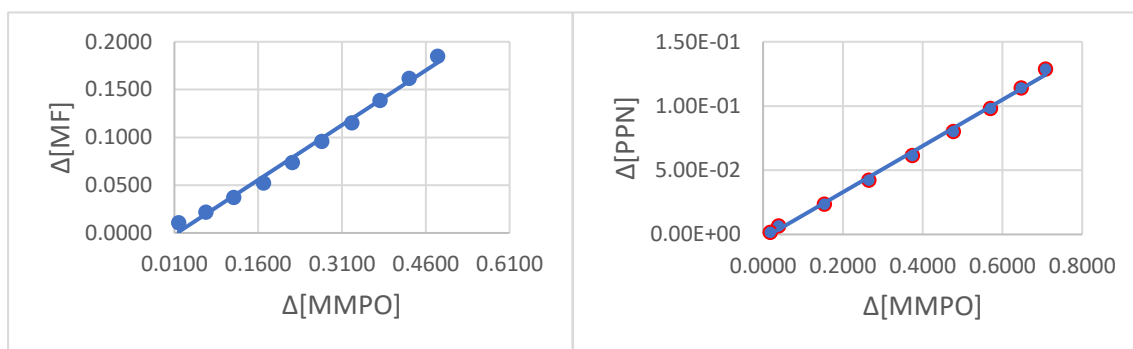

**Figure S4.** Example of the concentrations of carbonyls formed against reacted MMPO in the reaction with OH radicals.
